# Supplementary material
Source: Springer Nature journal article supplement (https://www.springermedizin.de/resource/supplementary/12914_2008_77_MOESM1_ESM.pdf/9537464)

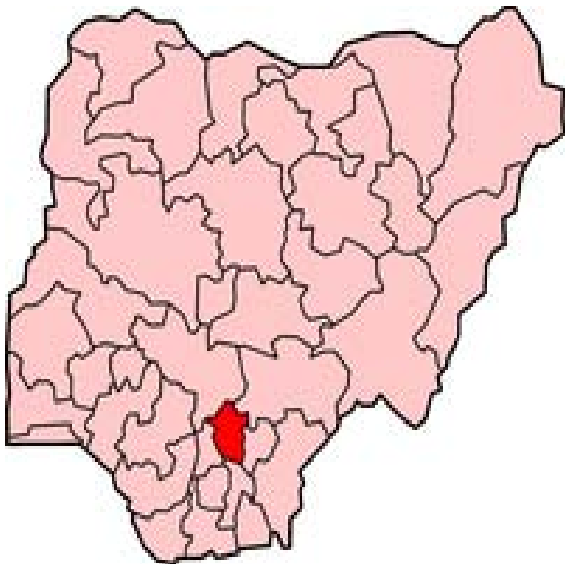

Supplement: MOESM1 [file 9537464]
